# Supplementary material for: Correction for Heal et al., “Marine Community Metabolomes Carry Fingerprints of Phytoplankton Community Composition”
Source: PubMed Central journal article supplement (PMC10134881; doi:10.1128/msystems.01086-22), 2023-03-20

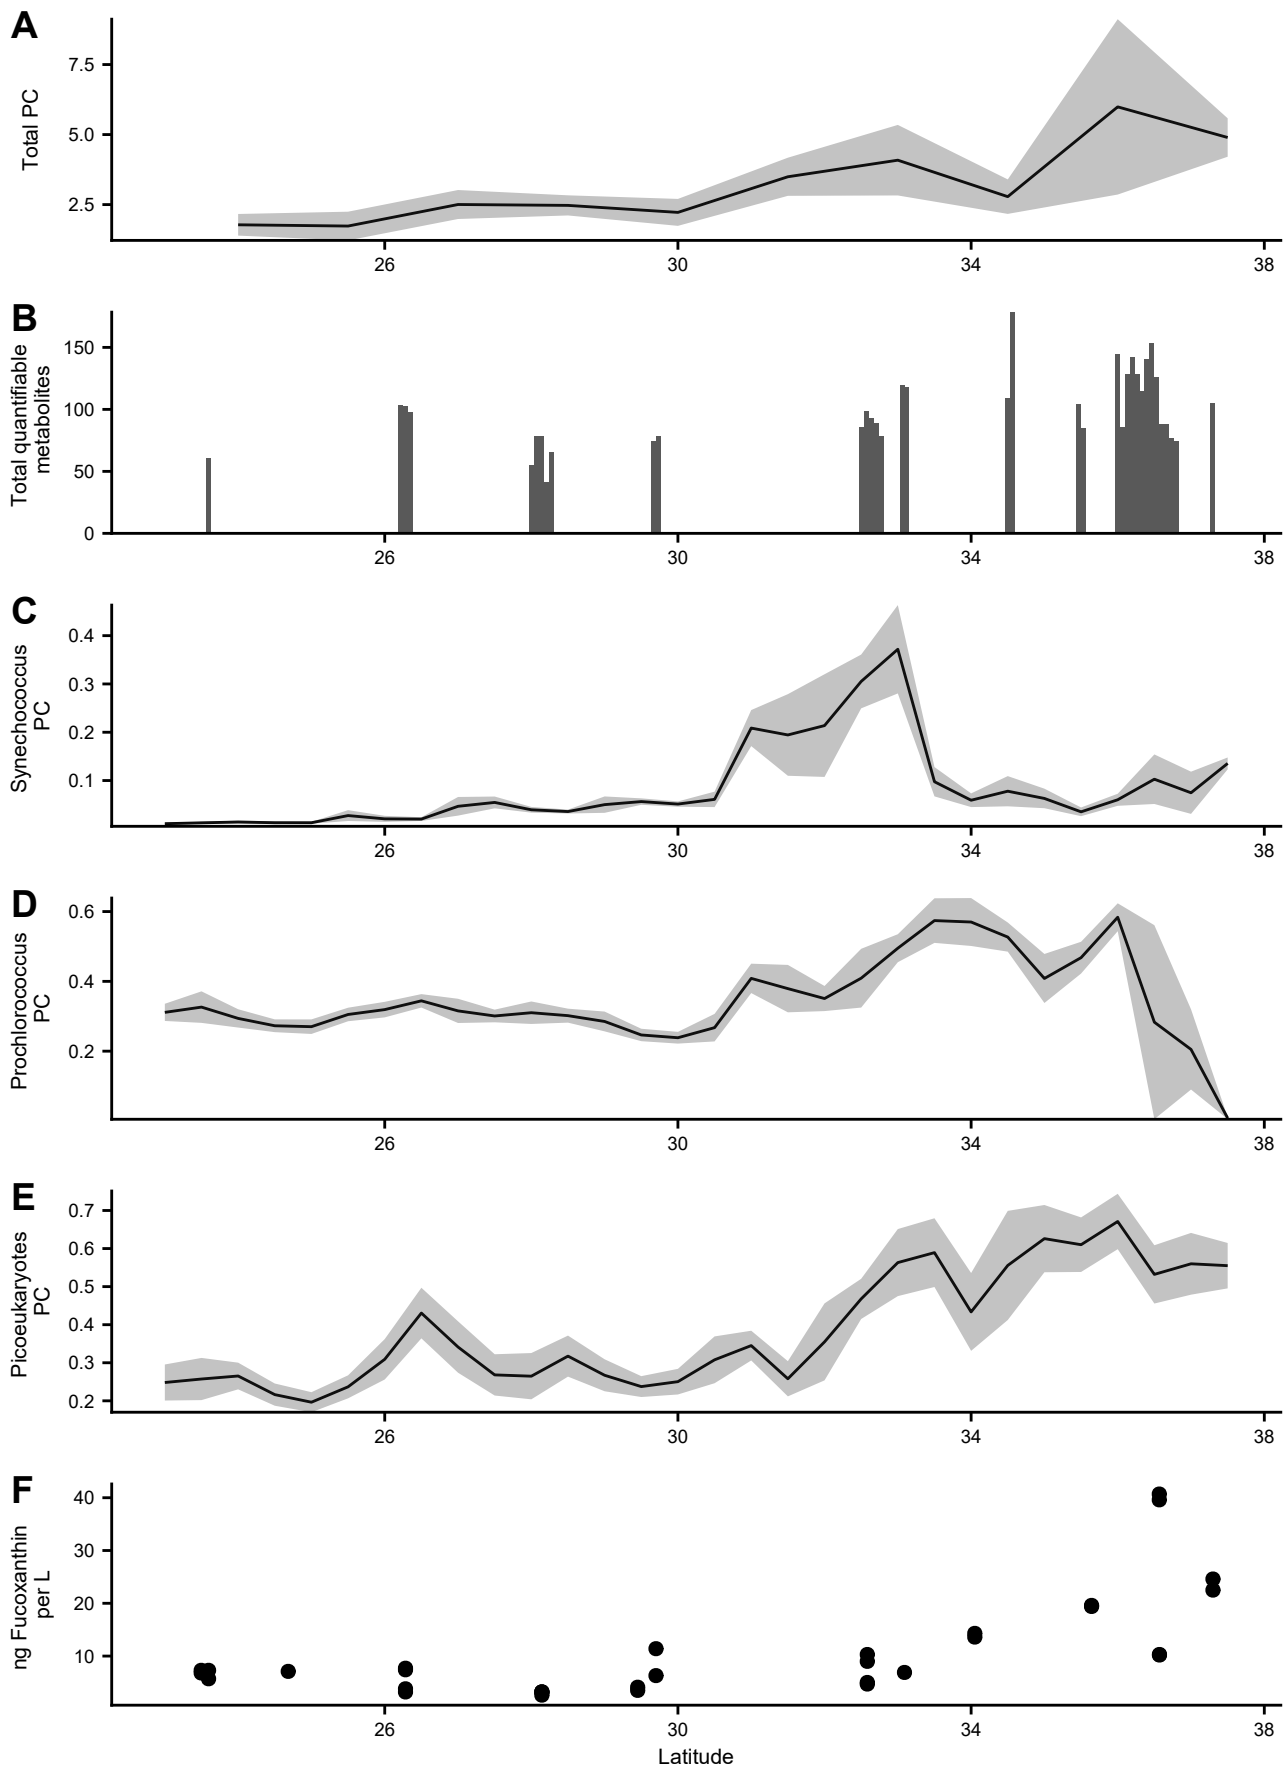

Supplement: msystems.01086-22-s0001.pdf [file msystems.01086-22-s0001.pdf]
